# Supplementary material for: Controllable synthesis, characterization and photoluminescence properties of flower-like BaMoO4 hierarchical architectures
Source: Royal Society of Chemistry journal article supplement (doi:10.1039/d0ce00371a), 2020-01-01
Supplement: d0ce00371a1.pdf [file d0ce00371a1.pdf]

## Supporting Information

### Controllable synthesis, characterization and photoluminescent properties of flower-like BaMoO<sub>4</sub> hierarchical architectures

YuQin Mao<sup>a</sup>, JianGang Wei<sup>a</sup>, Yongjin Zou<sup>b</sup> and LuPing Zhu<sup>a</sup>

<sup>a</sup>School of Environmental and Materials Engineering, Research Center of Resource Recycling Science and Engineering, Shanghai Polytechnic University, Shanghai 201209, China. E-mail: lpzhu@sspu.edu.cn (L.P. Zhu)

<sup>b</sup>Guangxi Key Laboratory of Information Materials, Guilin University of Electronic Technology(GUET), Guilin 541004, China.

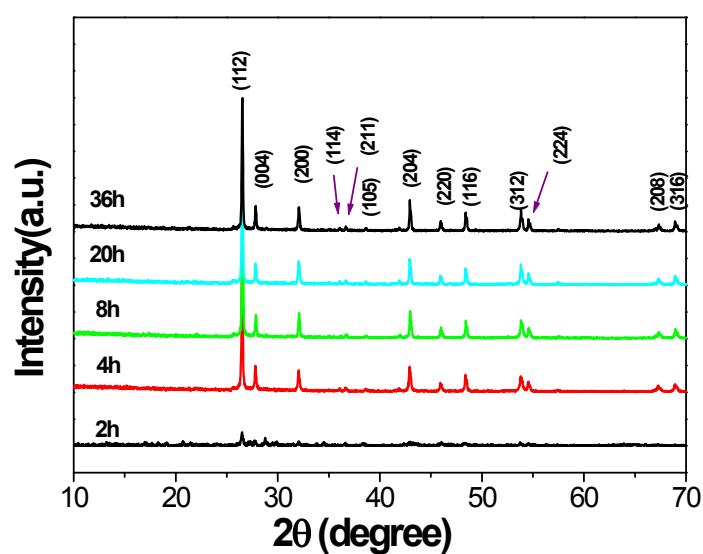

**Fig. S1** XRD pattern of the products prepared at 150 °C for different reaction times.

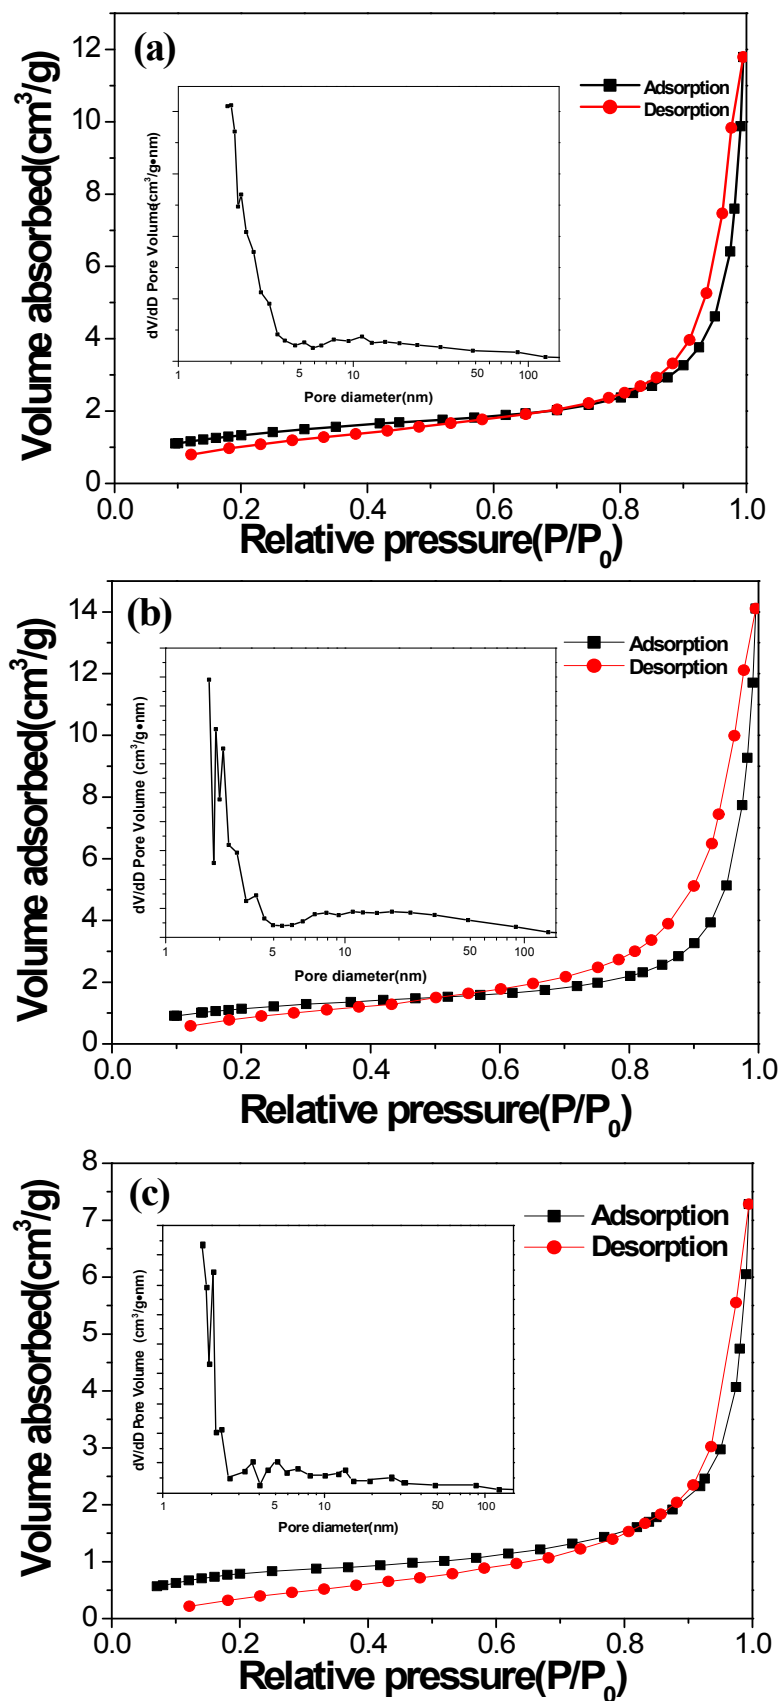

**Figure S2.** Typical N<sub>2</sub> gas adsorption-desorption isotherm of the BMO samples prepared at 150 °C for (a): (a) 4 h, (b) 8 h, (c) 16 h.
